# Supplementary material for: A nanofiltration membrane fabricated on a surfactant activated substrate with improved separation performance and acid resistance
Source: Royal Society of Chemistry journal article supplement (doi:10.1039/d1nj01915e), 2021-01-01
Supplement: d1nj01915e1.pdf [file d1nj01915e1.pdf]

**Electronic supplementary information for *New Journal of*  
*Chemistry***

**A nanofiltration membrane fabricated on the surfactant  
activated substrate with improved separation performance and  
acid-resistance**

Lu Bai<sup>1,2,3</sup>, Min Wang<sup>1,2,\*</sup>, Hongjun Yang<sup>1,2,\*\*</sup>, Zhengjun Peng<sup>1,2,3</sup>, Youjing Zhao<sup>1,2</sup>, Zhilu Li<sup>1,2</sup>

1 Key Laboratory of Comprehensive and Highly Efficient Utilization of Salt Lake Resources,  
Qinghai Institute of Salt Lakes, Chinese Academy of Sciences, Xining 810008, China;

2 Key Laboratory of Salt Lake Resources Chemistry of Qinghai Province, Xining 810008,  
China;

3 University of Chinese Academy of Sciences, Beijing 100049, China

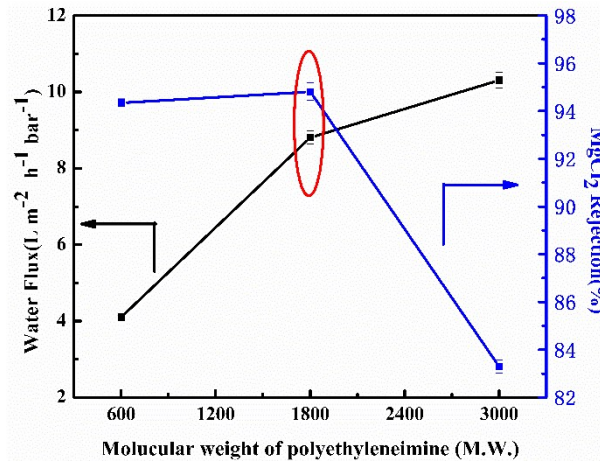

Fig. S1. Effect of molecular weight of polyethyleneimine on NF membrane performance.

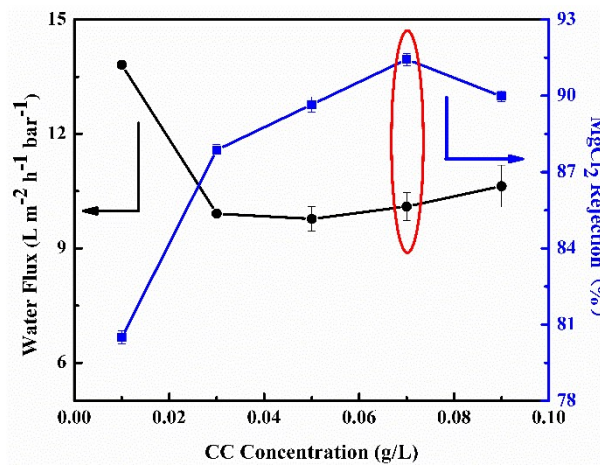

Fig. S2. Effect of CC concentration on NF membrane performance.

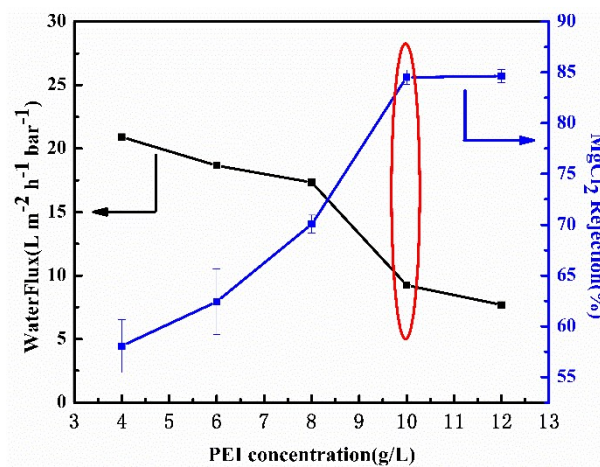

Fig. S3. Effect of PEI concentration on NF membrane performance.

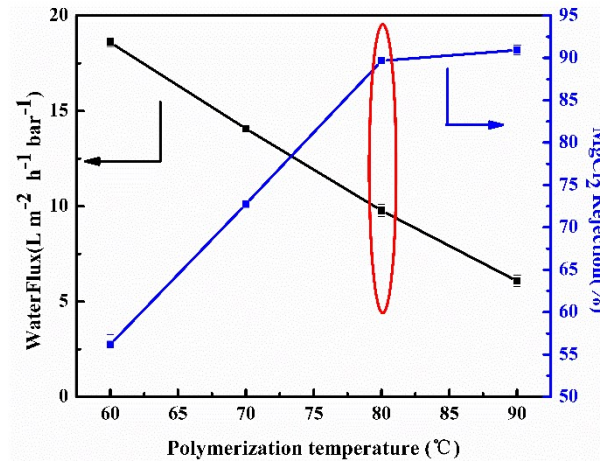

Fig. S4. Effect of polymerization temperature on NF membrane performance.
